**Figure S1. Partial mapping of the DM6 INP1 and INP2 sublineages**

**(A,B)** Full-size INP1 and INP2 clones of DM6 lineage, accompanied by DM6 NB clones, not shown, exhibit common (white arrows) as well as unique (yellow arrows) domains of neurite elaborations. Note their acquisition of distinct elaborations in gall, EB, and PLP (magenta arrows).

**(C-E)** Mitotic recombination at the beginning of INP proliferation, as schematized in [C], allows differential labeling of the first GMC's offspring (red) versus the remaining INP sublineage (green). The DM6 INP1 or INP2 subclones were identified based on the demonstrated morphological features characteristic of the full-size DM6 INP1 and INP2 clones (yellow and magenta arrows in [A] and [B]). Note the GMC1 clones of sibling INPs look alike but distinct from their paired INP subclones. Primary elaborations of the GMC1 clones are indicated. Scale bar: 100  $\mu$ m.

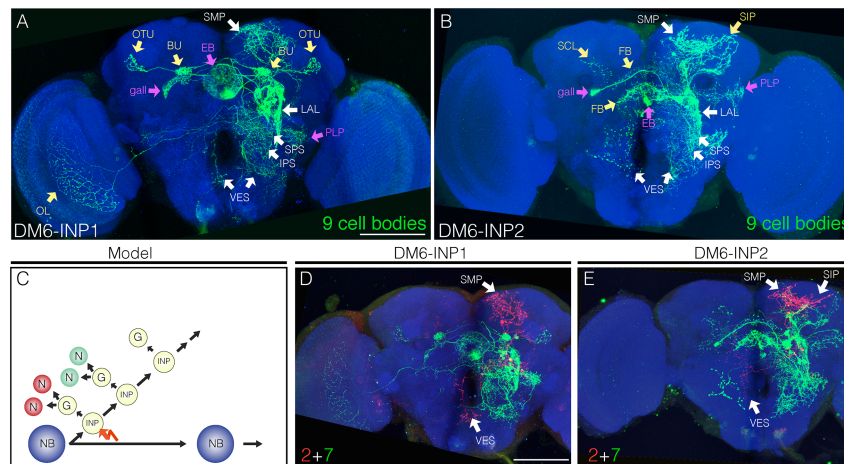

Source: https://cob.silverchair-cdn.com/cob/content_public/journal/dev/141/2/10.1242_dev.103069/3/dev103069.pdf
